# Supplementary material for: Ancient DNA reveals the timing and persistence of organellar genetic bottlenecks over 3,000 years of sunflower domestication and improvement
Source: PubMed Central journal article supplement (PMC6304678; doi:10.1111/eva.12594), 2018-02-13

Eden-2

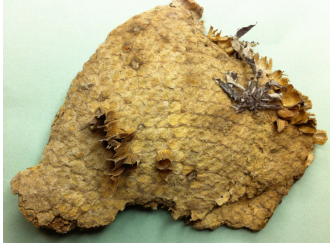

Eden-3

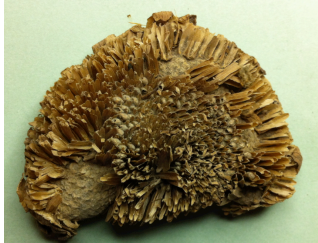

Eden-4

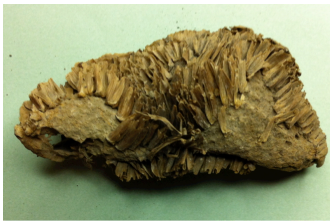

Eden-5

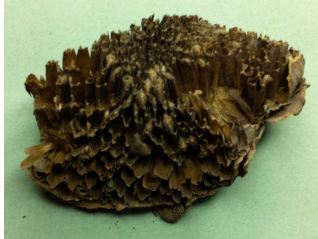

Eden-6

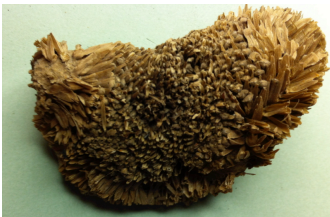

Eden-8

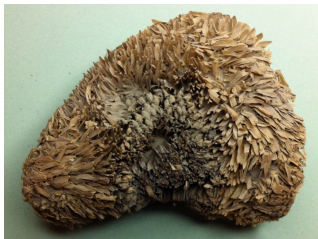

Eden-10

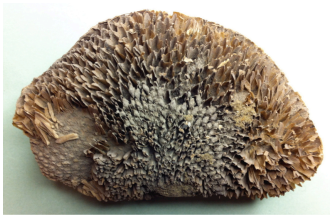

Eden-11

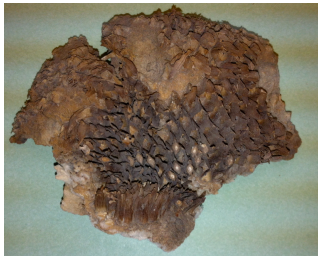

Eden-12

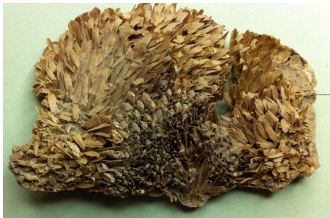

Eden-13

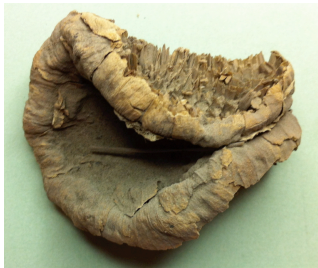

Eden-14

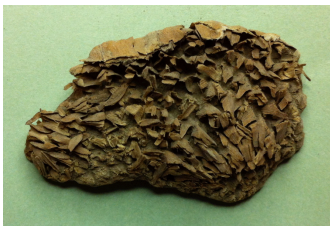

Eden-15

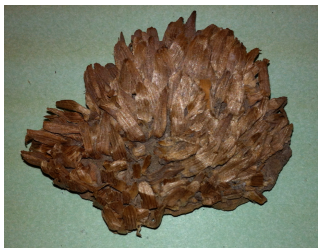

Eden-16

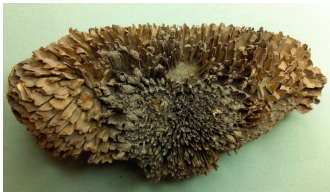

Supplement: EVA-12-38-s001.pdf [file EVA-12-38-s001.pdf]
