# Supplementary material for: Ancient DNA reveals the timing and persistence of organellar genetic bottlenecks over 3,000 years of sunflower domestication and improvement
Source: PubMed Central journal article supplement (PMC6304678; doi:10.1111/eva.12594), 2018-02-13

### Paiute 141856

Ethnographic achene  
Collected 1920s

$$\delta S = 0.0477 \pm 0.0071$$

Mean read length = 72.1 bp

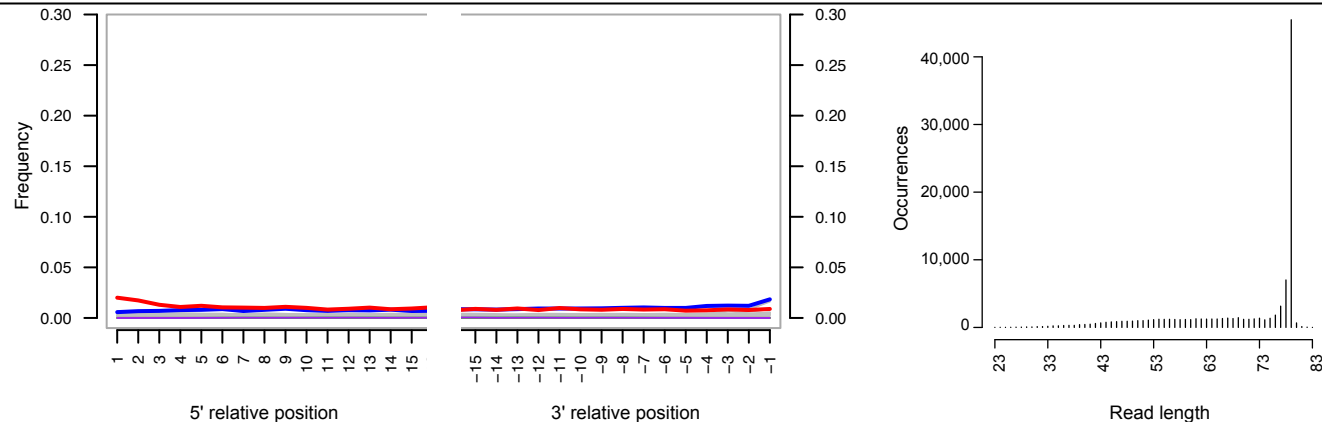

### Eden-2

Disk fragment  
915–795 years BP

$$\delta S = 0.5302 \pm 0.0115$$

Mean read length = 62.1 bp

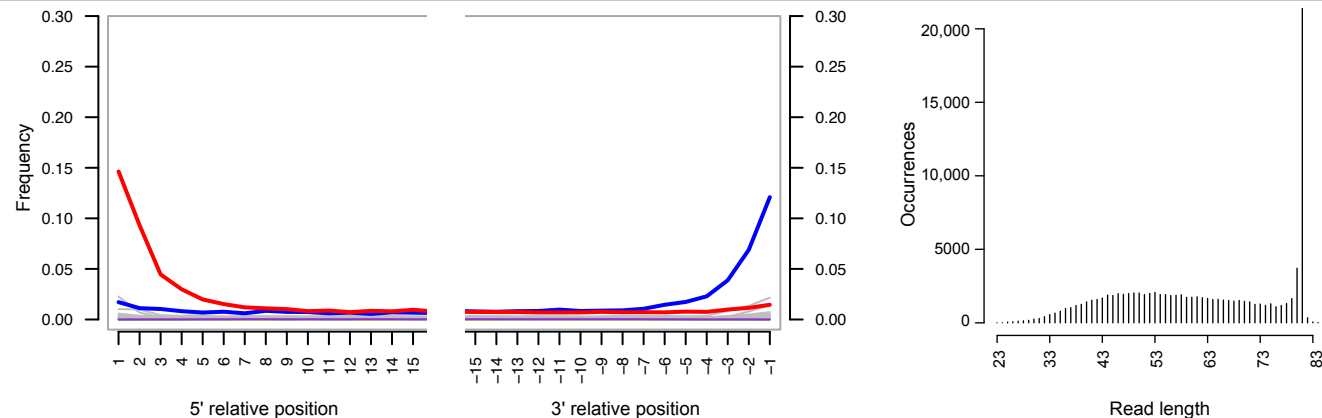

### Eden-3

Disk fragment  
3168–3005 years BP

$$\delta S = 0.9994 \pm 0.0006$$

Mean read length = 42.7 bp

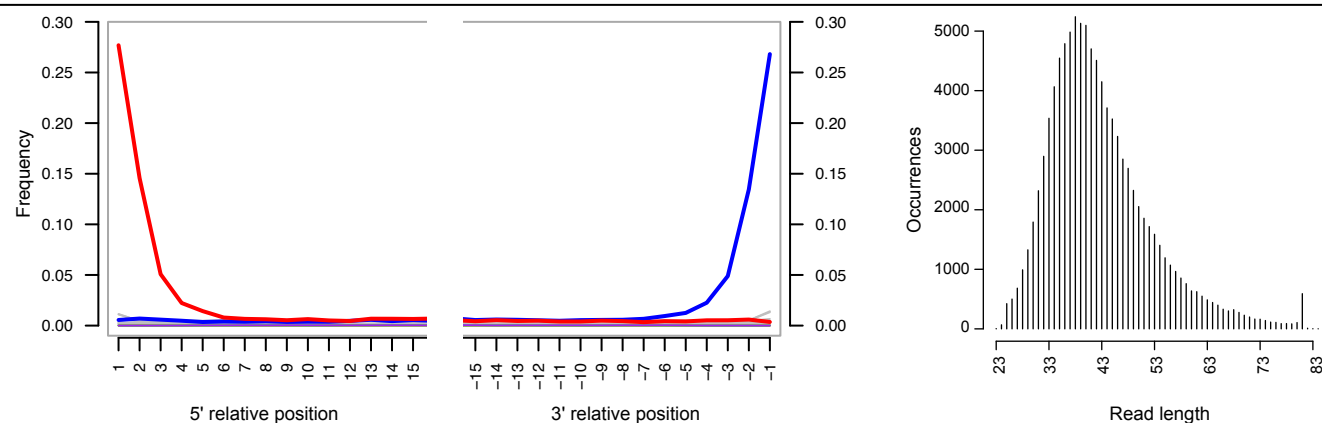

Supplement: EVA-12-38-s003.pdf [file EVA-12-38-s003.pdf]
