# Supplementary material for: Ancient DNA reveals the timing and persistence of organellar genetic bottlenecks over 3,000 years of sunflower domestication and improvement
Source: PubMed Central journal article supplement (PMC6304678; doi:10.1111/eva.12594), 2018-02-13

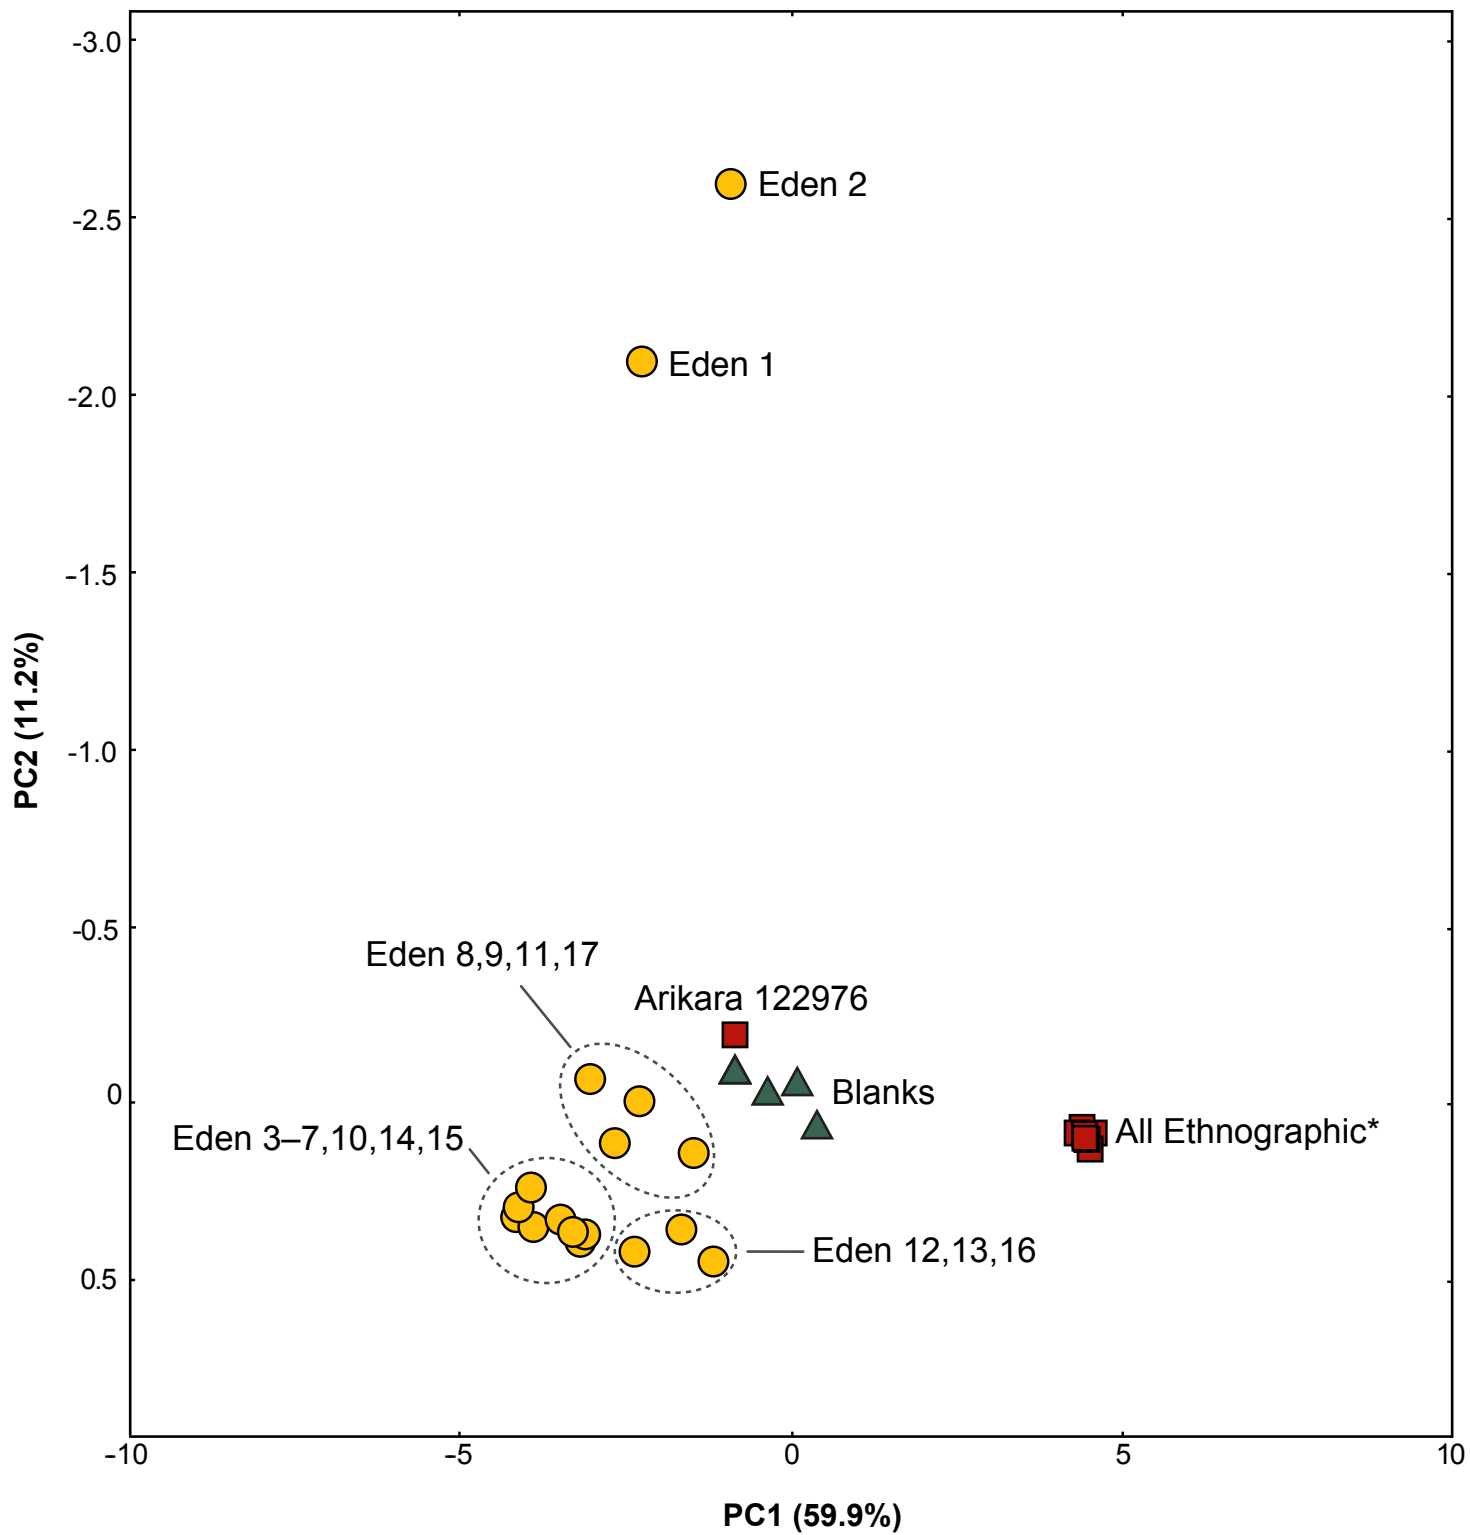

Supplement: EVA-12-38-s004.pdf [file EVA-12-38-s004.pdf]
